# Supplementary material for: The Biomass of Pig-Blood-Derived Carbon as a Novel Electrode Material for Hydrogen Peroxide Electrochemical Sensing
Source: MDPI journal article supplement (doi:10.3390/catal12111438), 2022-11-15
Supplement: s1 [file s1]

## Supporting Information

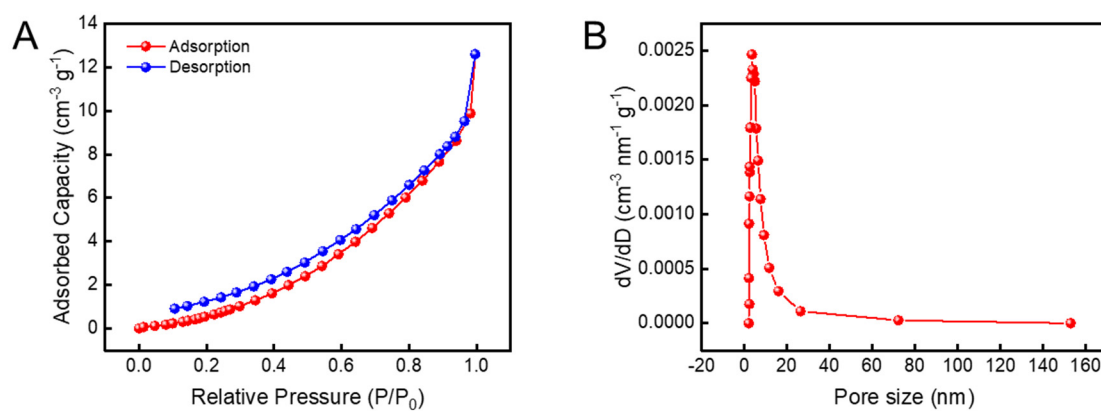

**Figure S1.** (A) isotherms of nitrogen sorption and (B) the corresponding QSDFT pore size distributions determined by adsorption branch of nitrogen sorption isotherms.

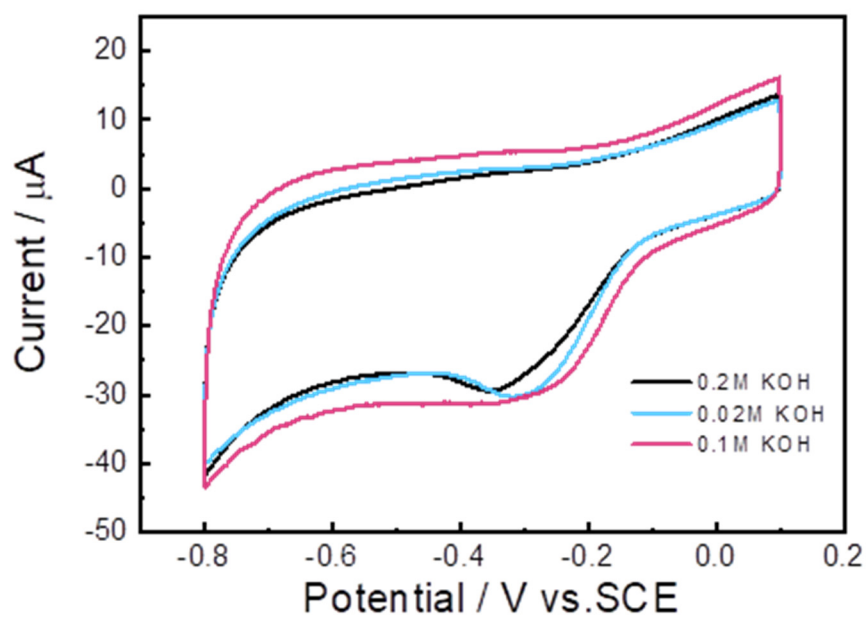

**Figure S2.** CVs of the Fe-BC-900/GCE in different concentrations of KOH solutions with N<sub>2</sub>-saturated 0.1 mM H<sub>2</sub>O<sub>2</sub>.

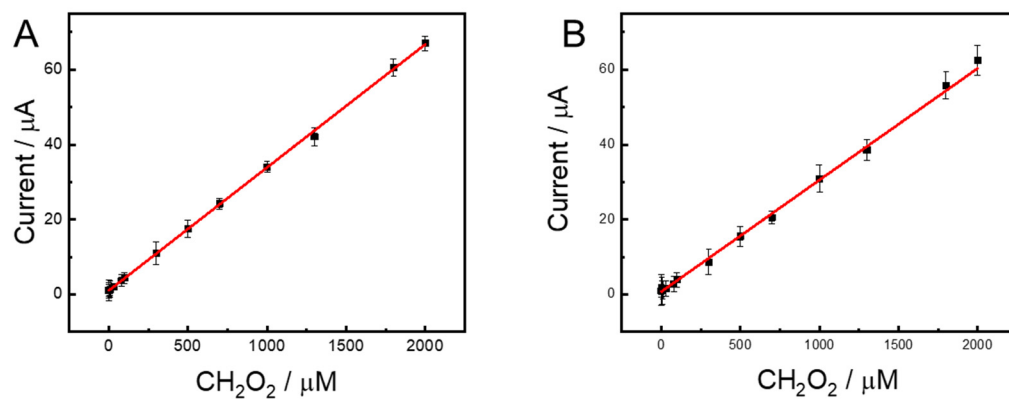

**Figure S3.** Plots of (A) current measured at +0.15 V against the concentration of  $\text{H}_2\text{O}_2$ , (B) peak current measured at +0.29 V against the concentration of  $\text{H}_2\text{O}_2$ .

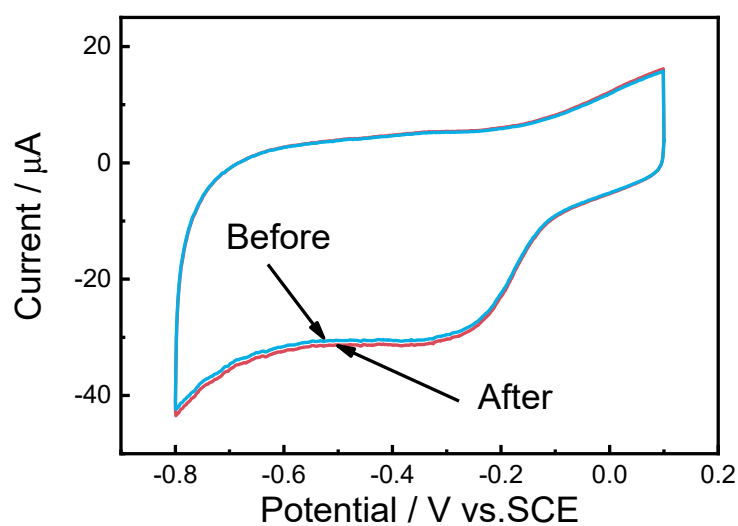

**Figure S4.** CVs of the Fe-BC-900/GCE in 0.1 M KOH with 0.1 mM  $\text{H}_2\text{O}_2$  solution at the first cycle and the 100 cycles, respectively.
